# Supplementary material for: Receptor-targeted engineered probiotics mitigate lethal Listeria infection
Source: PubMed Central journal article supplement (PMC7732855; doi:10.1038/s41467-020-20200-5), 2020-12-11
Supplement: 41467_2020_20200_MOESM1_ESM.pdf [file 41467_2020_20200_MOESM1_ESM.pdf]

## SUPPLEMENTARY INFORMATION

# Receptor-targeted engineered probiotics mitigate lethal *Listeria* infection

**Rishi Drolia<sup>1,2</sup>, Mary Anne Roshni Amalaradjou<sup>1,3</sup>, Valerie Ryan<sup>1</sup>, Shivendra Tenguria<sup>1,2</sup>, Dongqi Liu<sup>1,2</sup>, Xingjian Bai<sup>1</sup>, Luping Xu<sup>1</sup>, Atul K. Singh<sup>1</sup>, Abigail D. Cox<sup>4</sup>, Victor Bernal-Crespo<sup>4</sup>, James A. Schaber<sup>5</sup>, Bruce M. Applegate<sup>1,6</sup>, Ramesh Vemulapalli<sup>4,7</sup>, and Arun K. Bhunia<sup>1,2,4,6\*</sup>**

<sup>1</sup>Molecular Food Microbiology Laboratory, Department of Food Science, Purdue University, West Lafayette, IN, USA

<sup>2</sup>Purdue Institute of Inflammation, Immunology and Infectious Disease, Purdue University, West Lafayette, IN, USA

<sup>3</sup>Department of Animal Science, University of Connecticut, Storrs, CT, USA

<sup>4</sup>Department of Comparative Pathobiology, Purdue University, West Lafayette, IN, USA

<sup>5</sup>Bindley Bioscience Research Center, Purdue University, West Lafayette, IN, USA

<sup>6</sup>Purdue University Interdisciplinary Life Science Program, Purdue University, West Lafayette, IN, USA

<sup>7</sup>Department of Veterinary Pathobiology, Texas A&M University, College Station, TX, USA

\*bhunia@purdue.edu

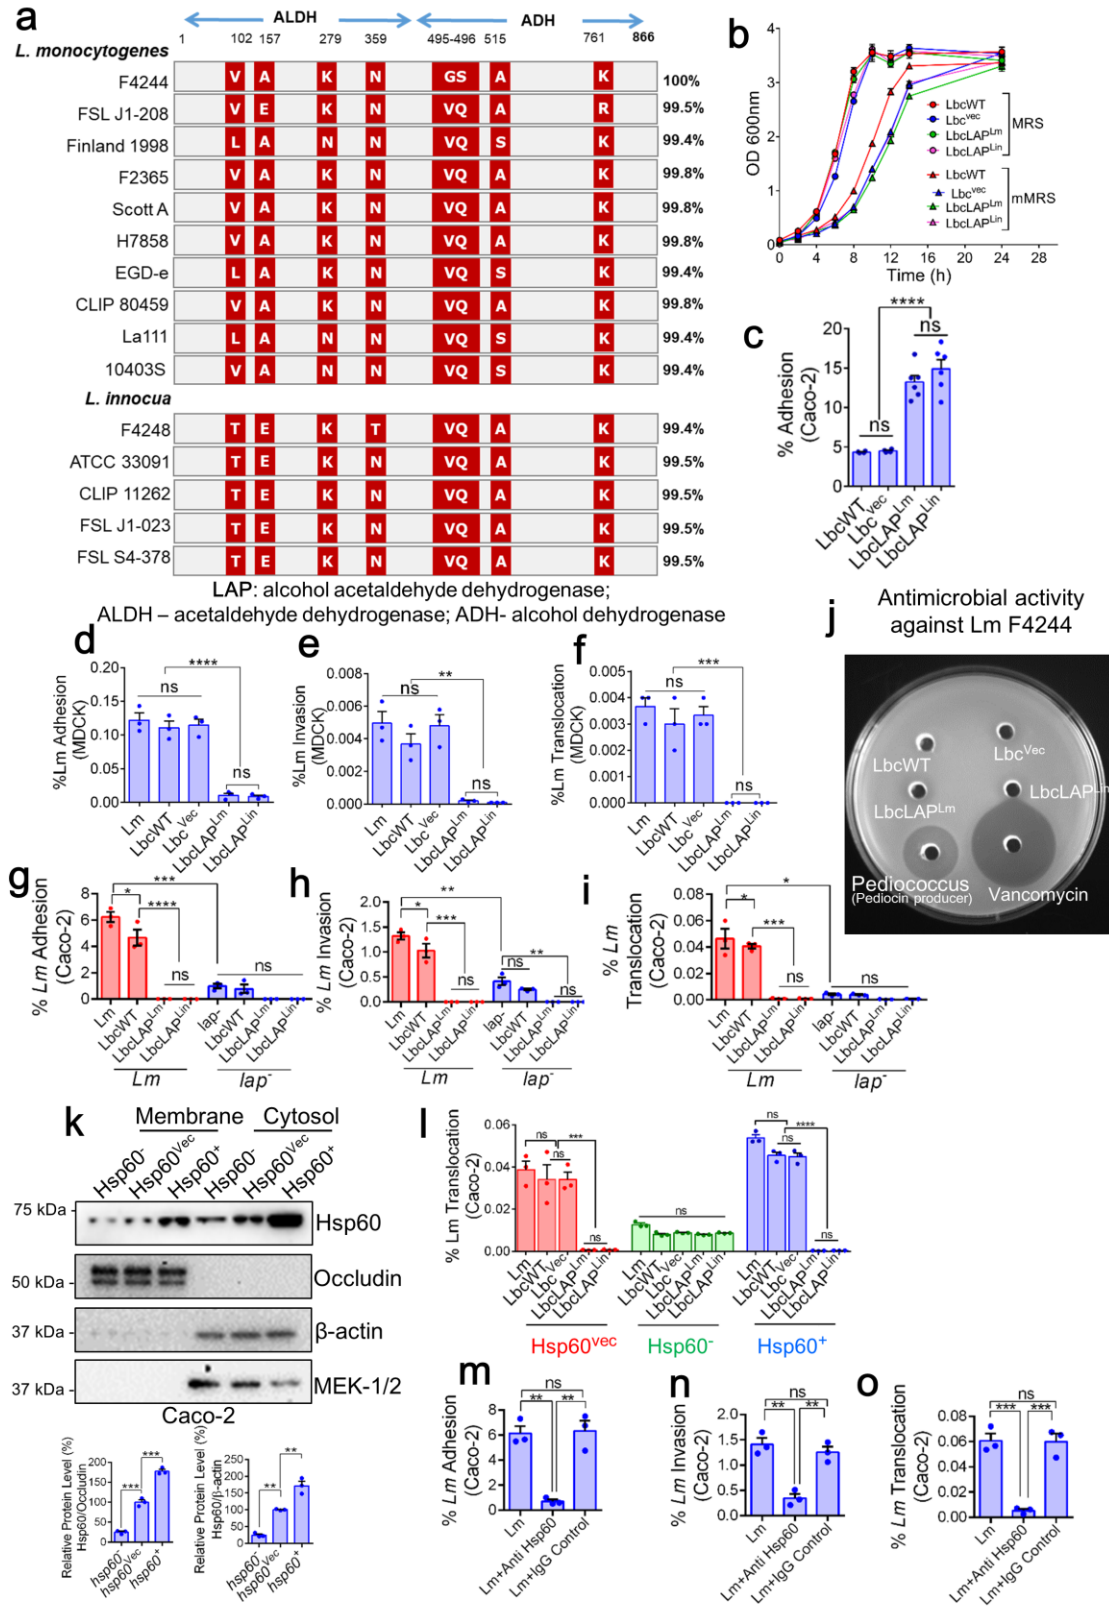

Supplementary Fig. 1 Analysis of LAP sequence, characterization of BLP-strains and Hsp60 expression in Caco-2 cells.

- (a)** Comparison of the amino acid sequence of LAP from different strains of *Lm* and *Lin* obtained from the NCBI database.
- (b)** Similar growth profiles of BLP strains in MRS and mMRS broths, relative to LbcWT or Lbc<sup>Vec</sup> strains. ( $n = 3$ )
- (c)** Increased adhesion (MOE 10, 24 h) of the BLP strains ( $n = 6$ ), relative to LbcWT ( $n = 4$ ) strains or Lbc<sup>Vec</sup> ( $n = 4$ ) to Caco-2 cells.
- (d-f,  $n = 3$ )** Increased inhibition of *Lm* adhesion (**d**), invasion (**e**) and translocation (**f**) by the BLP strains in MDCK cells pre-exposed to *L. casei* strains for 24 h (MOE 10). *Lm* (MOI 50) was exposed for 1 h for adhesion and 2 h for invasion and translocation assays.
- (g-i,  $n = 3$ )** Increased inhibition of *Lm* (wild type) adhesion (**g**), invasion (**h**) and translocation (**i**) but not of the *lap*<sup>-</sup> strain by the BLP strains in Caco-2 cells pre-exposed to *L. casei* strains for 24 h (MOE 10). *Lm* exposure as in **d-f**.
- (j)** Agar well diffusion assay showing the absence of bacteriocin-like antimicrobial activity in LbcWT, Lbc<sup>Vec</sup> and BLP strains against *Lm* lawn. *Pediococcus acidilactici*, (pediocin; a bacteriocin producer) and vancomycin were used as positive controls.
- (k)** Immunoblot confirming Hsp60-knockdown (Hsp60<sup>-</sup>) and- overexpression (Hsp60<sup>+</sup>), relative to Hsp60<sup>Vec</sup> in Caco-2 cells. Occludin; membrane marker, and MEK-1/2; cytosolic marker. Bottom panels show normalized densitometry reports ( $n = 3$ ).
- (l)** Increased inhibition of *Lm* translocation ( $n = 3$ ) by the BLP strains in Hsp60<sup>Vec</sup> and Hsp60<sup>+</sup> but not in Hsp60<sup>-</sup> Caco-2 cells. *L. casei* pre-exposed for 24 h (MOE 10) before exposure to *Lm* for 2 h (MOI 50).
- (m-o,  $n = 3$ )** Decreased *Lm* adhesion (**m**), invasion (**n**) and translocation (**o**) in Caco-2 cells incubated with anti-Hsp60 mAb (5 µg/ml, 1 h) before *Lm* exposure. *Lm* exposure as in **d-f**.

Data in **b**, **c-i** and **k-o** represent the mean  $\pm$  SEM with  $n =$  biologically independent samples from three independent experiments. The one-way (**c-f**, **k**, **m-o**) or two-way (**g-i**, **l**) ANOVA test followed by Tukey's multiple comparisons was used. For all analysis: \*\*\*\* $p < 0.0001$ ; \*\*\* $p < 0.001$ ; \* $p < 0.05$ ; ns, no significance. Source data are provided as a Source Data file.

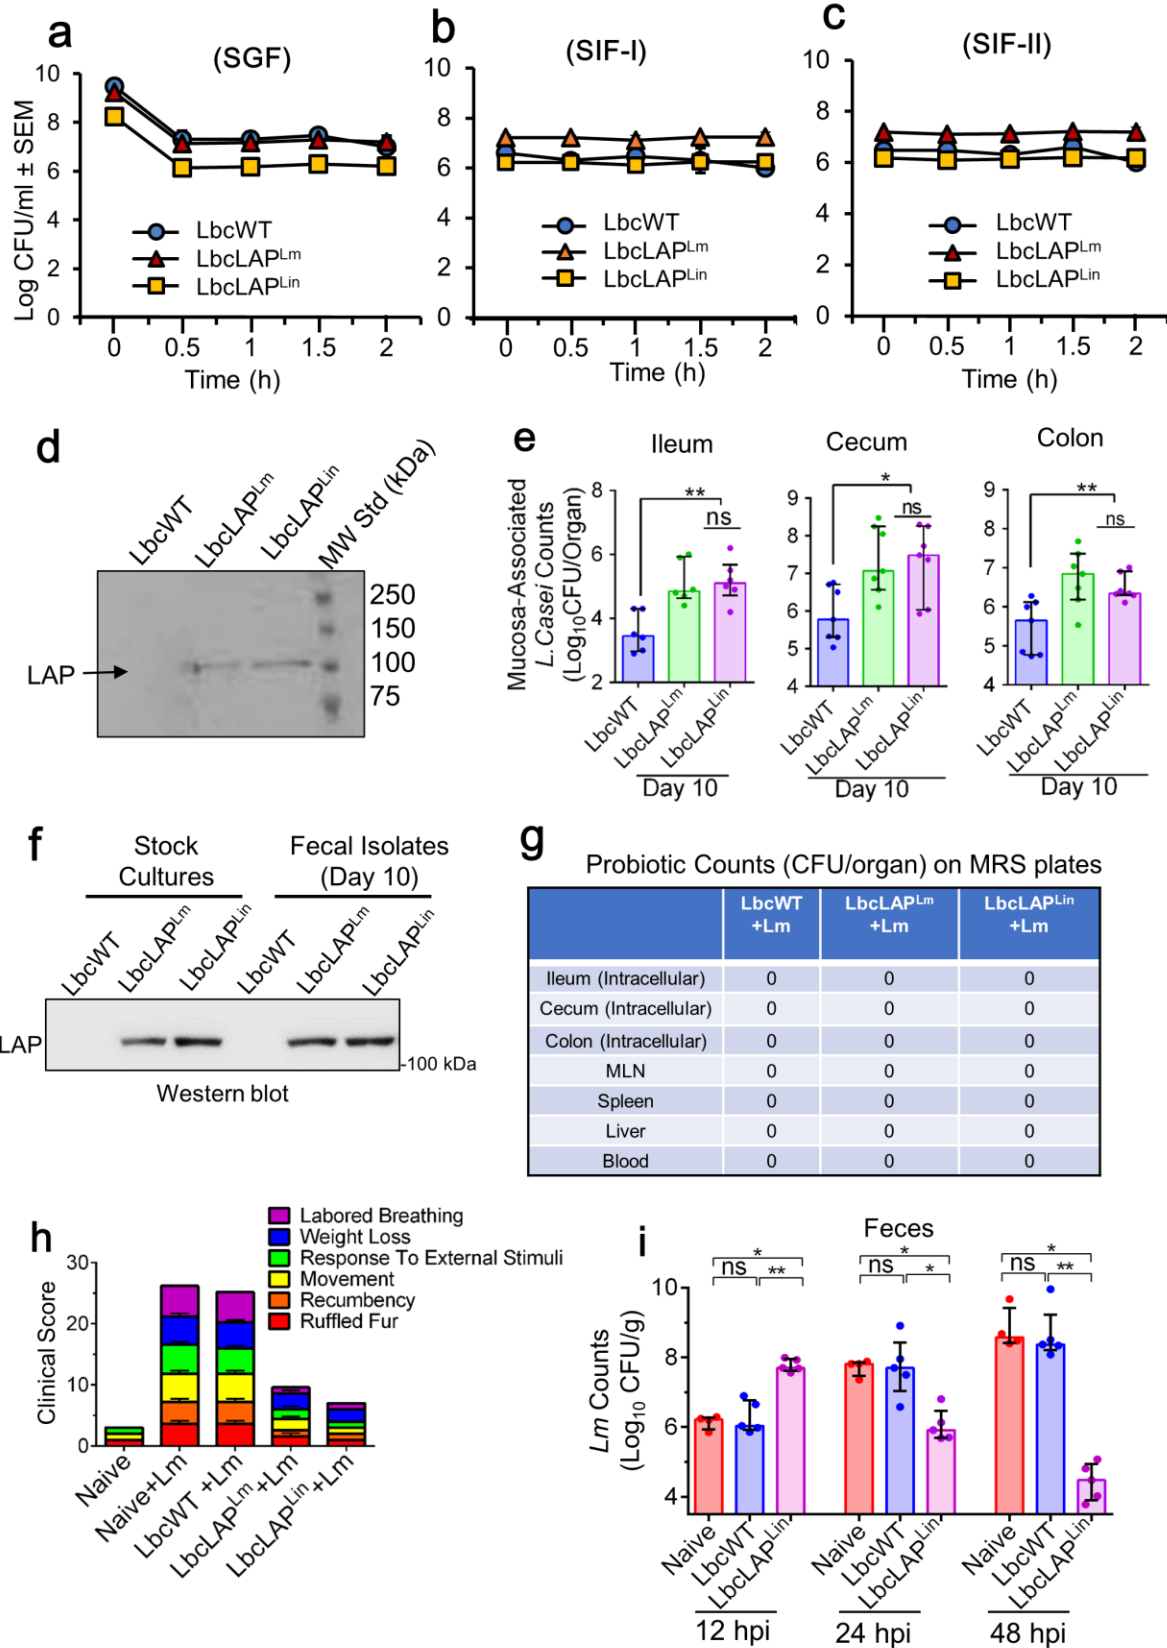

Supplementary Fig. 2 *In vitro* and *in vivo* characterization of BLP strains.

**(a-c)** Similar survival of *L. casei* (LbcWT) and BLP strains in simulated gastric fluid (SGF) **(a)**, simulated intestinal fluid I (SGF-I) **(b)**, and simulated intestinal fluid II (SGF-II) **(c)**. Data represent the mean of one single experiment with similar results from the three independent experiments.

**(d)** Immunoblot confirmation of LAP expression in BLP strains following sequential exposure to SGF, SIF-I, and SGF-II.

**(e)** Increased mucosal association of BLP strains in the ileum ( $n = 6$ ), cecum ( $n = 7$ ), and colon ( $n = 7$ ), of mice on day 10. No colonies were detected on MRS+vancomycin plates from mock-treated control (naïve) animals. Each point represents an individual mouse ( $n$ ) from three independent experiments.

**(f)** Immunoblot confirmation of LAP expression in fecal isolates of BLP strains.

**(g)** No BLP strains (10 days treatment) were detected in the intestinal (after gentamicin protection assay) or extra-intestinal tissue samples. Data are representative of  $n = 7$  mice from three independent experiments.

**(h)** Clinical score of mice after *Lm* challenge. Data represent mean  $\pm$  SEM from  $n = 5$  representative mice from each treatment group of three independent experiments.

**(i)** Increased *Lm* shedding in the feces in mice treated with BLP-strains at 12 hpi ( $n = 4, 5, 5$ , for each group, respectively) but significantly reduced at 24 ( $n = 4, 5, 5$ , for each group, respectively) and 48 ( $n = 4, 5, 5$ , for each group, respectively) hpi. Each point represents an individual mouse ( $n$ ) from two independent experiments.

Bar and brackets in **e** and **i** represent the median and interquartile range, respectively. The Mann-Whitney nonparametric test (two-tailed) was used, and comparisons were made between each treatment group individually. For all analysis: \*\* $p < 0.01$ ; \* $p < 0.05$ ; ns, no significance. Panels **d** and **f** are representative of three independent experiments. Source data are provided as a Source Data file.

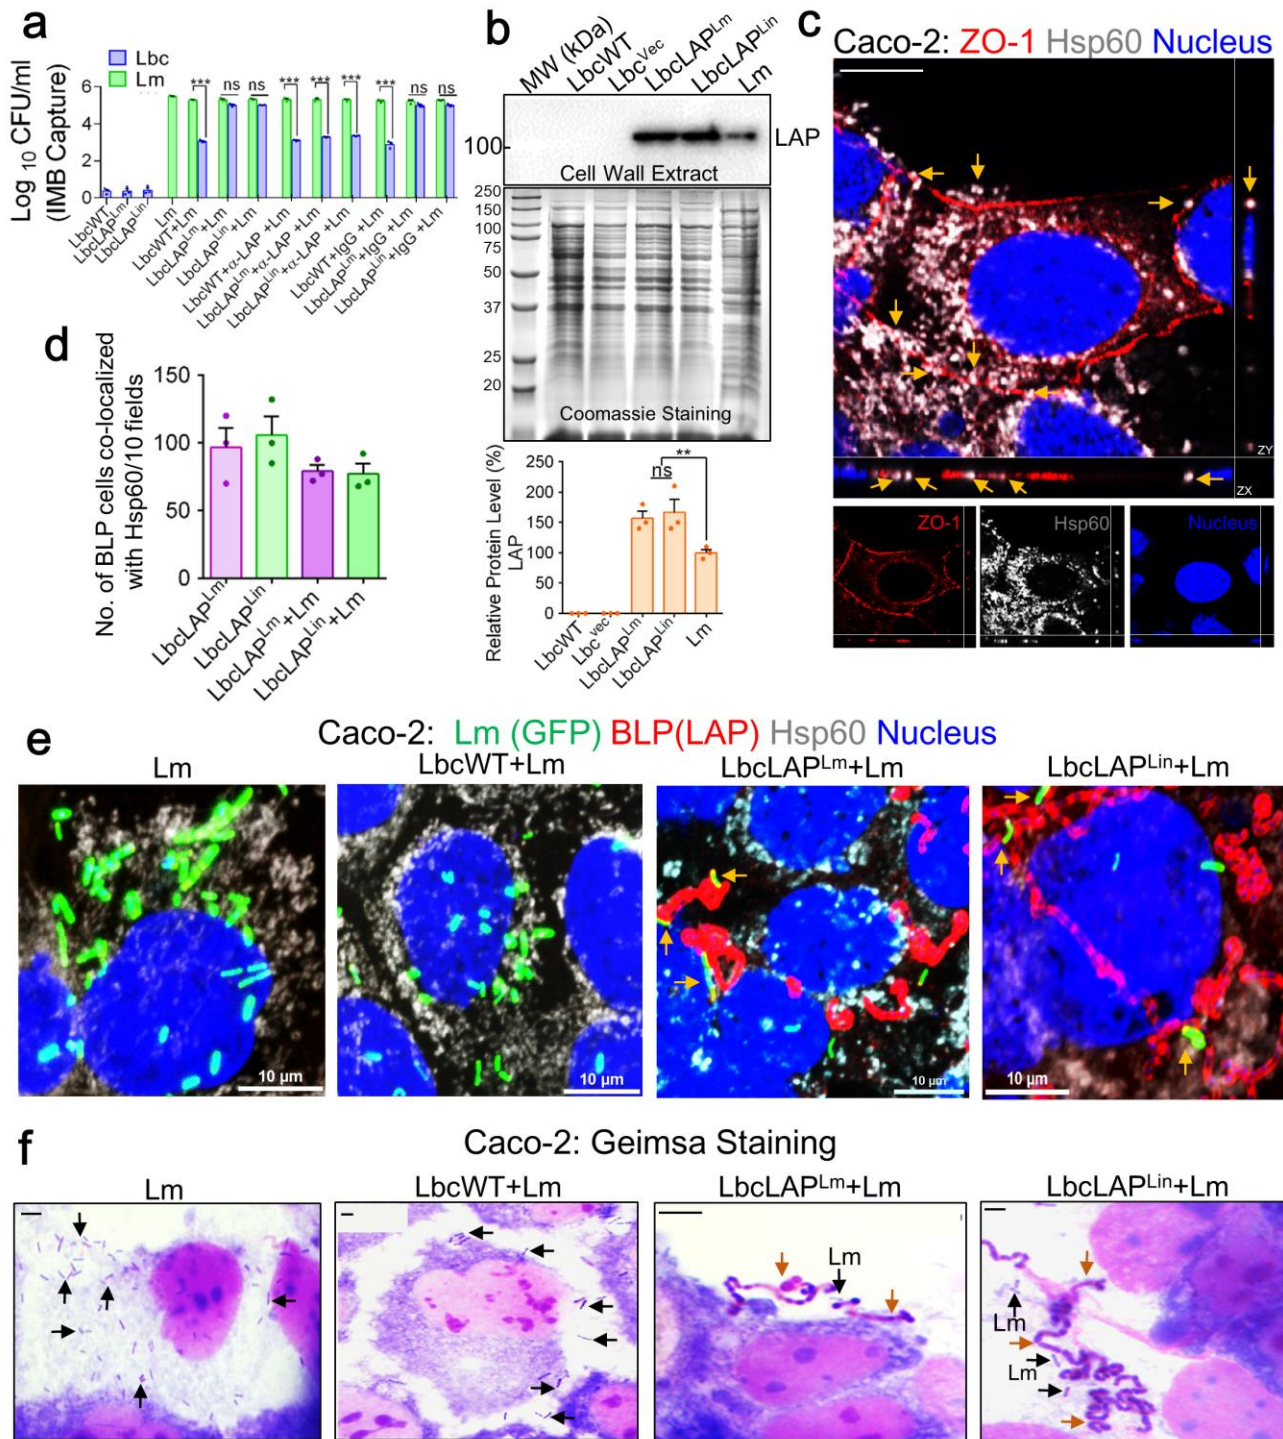

**Supplementary Fig. 3 Co-aggregation and surface co-localization of BLP with Hsp60.**

(a) Inhibition of formation of BLP-*Lm* co-aggregates (CFU, mean  $\pm$  SEM,  $n = 3$  from three independent experiments) by pre-incubation of BLP with anti-LAP mAb but not with an isotype IgG followed by IMB-based capture.

(b) Western blot showing relative expression of LAP on BLP and *Lm* cell wall. Equal amounts of proteins are analyzed (BCA assay) as confirmed by Coomassie blue staining (bottom panel). The densitometry report (bottom-most panel) represent mean  $\pm$  SEM,  $n = 3$  from three independent experiments.

(c) Micrographs of Caco-2 cells immunostained for ZO-1 (red, cell periphery), Hsp60 (white, host cell receptor) and nucleus (blue; DAPI). Surface expression of Hsp60 (white) and co-localization with ZO-1 (red) were evident on the Caco-2 cell membrane (puncta, yellow arrows). Separated channels; bottom panels. Bars, 10  $\mu$ m.

(d) Measurements (mean  $\pm$  SEM) of co-localized BLP cells with membrane expressed Hsp60 from immunostained images (**Fig. 4 e-h**). Each point represents an average of 10 fields from each of the three independent experiments  $n = 30$  fields.

(e) Micrographs of *Lm*-GFP cells co-incubated with or without *L. casei* (LbcWT and BLP) strains on Caco-2 cells (1:1 ratio, MOE 50 for each, 1 h). Cells were immunostained for LAP on BLP strains (red), Hsp60 (white, host cell receptor) DAPI (blue, nucleus) and *Lm*-GFP cells (green). Bars, 10  $\mu$ m. In BLP co-incubated cells the *Lm*-GFP cells showed markedly reduced adhesion and BLP cells were co-aggregated with *Lm*-GFP cells (arrows). No immunostaining of LbcWT was observed with the anti-LAP mAb.

(f) Giemsa staining micrographs depicting reduced adhesion and competitive exclusion of *Lm* (black arrow) cells by BLP strains (yellow arrows) but not by LbcWT strains. *Lm* cells with or without *L. casei* (LbcWT and BLP strains) strains were co-incubated (1:1 ratio, MOE 50 for each, 1 h) on Caco-2 cells. Bars, 1  $\mu$ m.

For plots, **a**, **b** and **d**, the one-way ANOVA test followed by Tukey's multiple comparisons was used. For all analysis: \*\*\* $p < 0.001$ ; \*\* $p < 0.01$ ; ns, no significance. All images in **c**, **e**, **f** are representative of five different fields from three independent experiments. Source data are provided as a Source Data file.

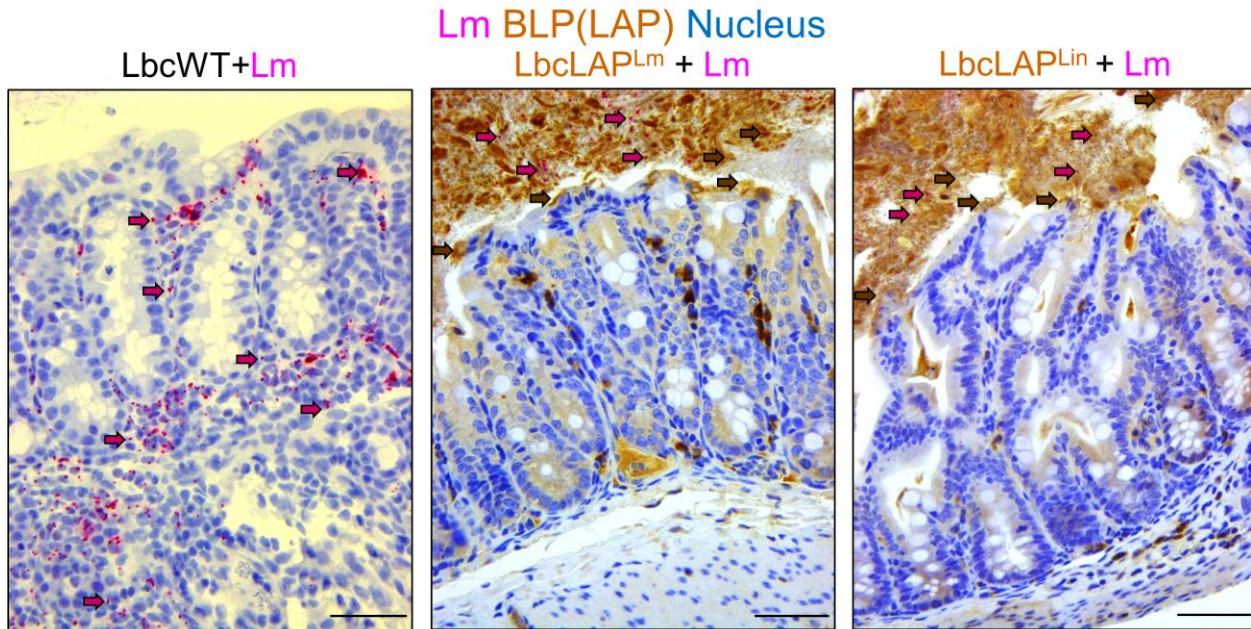

**Supplementary Fig. 4 BLP and *Lm* co-aggregation on colonic villi.**

Zoomed-out micrographs of colonic villi of LbcWT-or BLP-treated (10 days) mice at 48 hpi dual immunostained for *Listeria* (anti-*Lm* pAb, pink rods, pink arrows) and LAP (anti-LAP mAb to stain the BLP strains, brown, brown arrows) and counterstained with hematoxylin to stain the nucleus (blue). Bars, 25  $\mu$ m. Translocated *Lm* is observed in the lamina propria (pink arrows, left panel) in LbcWT-treated mice but confined in the lumen (pink arrows, middle and right panels) in BLP-treated mice. Images are representative of 10 different fields from 4 independent mice for each treatment. Source data are provided as a Source Data file.



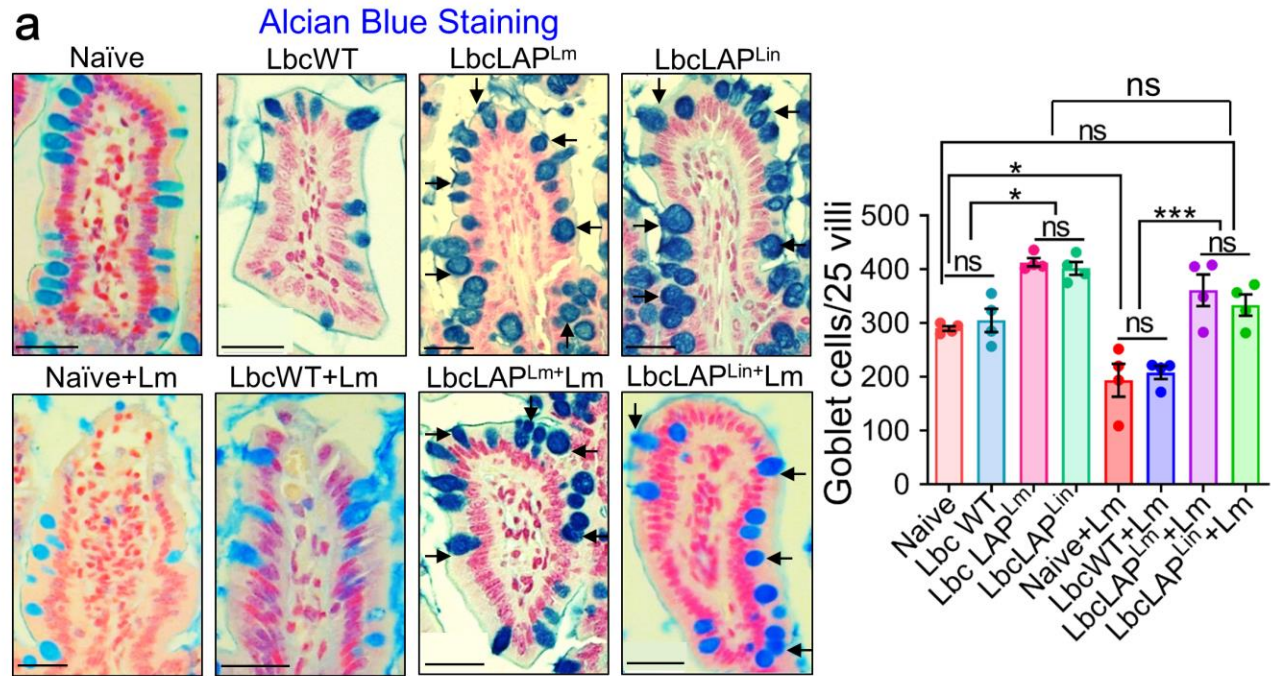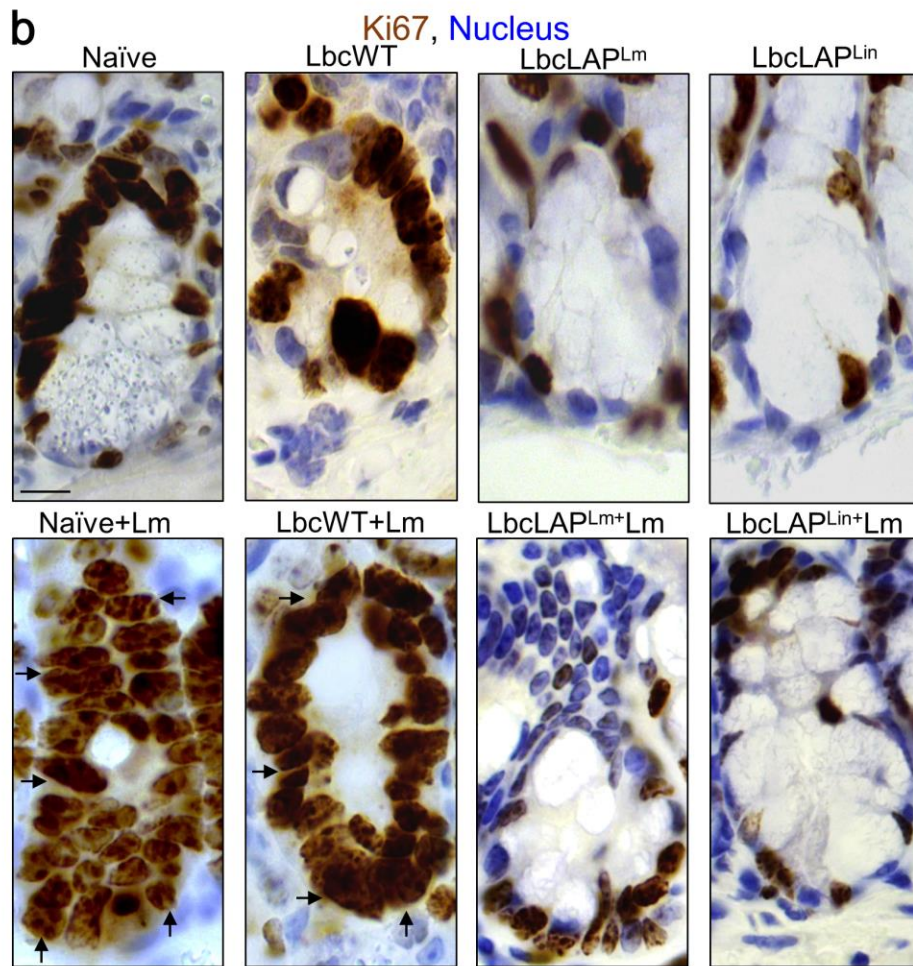

Supplementary Fig. 5 Goblet cell counts and crypt cell proliferation in ileal villi.

**(a)** Representative Alcian blue staining micrographs of ileal tissue sections from control (mock-treated) uninfected naïve mice, *L. casei*-treated (10 days, LbcWT or BLP) pre or post-*Lm* challenge at 48 hpi depicting increased goblet cells (arrows) in BLP-treated mice and quantification of goblet cells (right panel, each point represents an individual mouse, 4 mice per group,  $n = 100$  villi). Scale bar, 25  $\mu\text{m}$ . Data represent the mean  $\pm$  SEM and statistical significance was determined by using the one-way ANOVA test followed by Tukey's multiple comparisons. For analysis: \*\*\* $p < 0.001$ ; \* $p < 0.05$ ; ns, no significance. Source data are provided as a Source Data file.

**(b)** Representative immunohistochemical micrographs (high magnification) of the ileal crypt stained for Ki67 (brown) from control (mock-treated) uninfected naïve mice or *L. casei*-treated (10 days, LbcWT or BLP) pre-or post-*Lm* challenge at 48 hpi. Arrows depict increased Ki67<sup>+</sup> cells in the naïve of LbcWT-treated mice at 48 hpi. Scale bar, 10  $\mu\text{m}$ . Images (a, b) are representative of four independent mice.

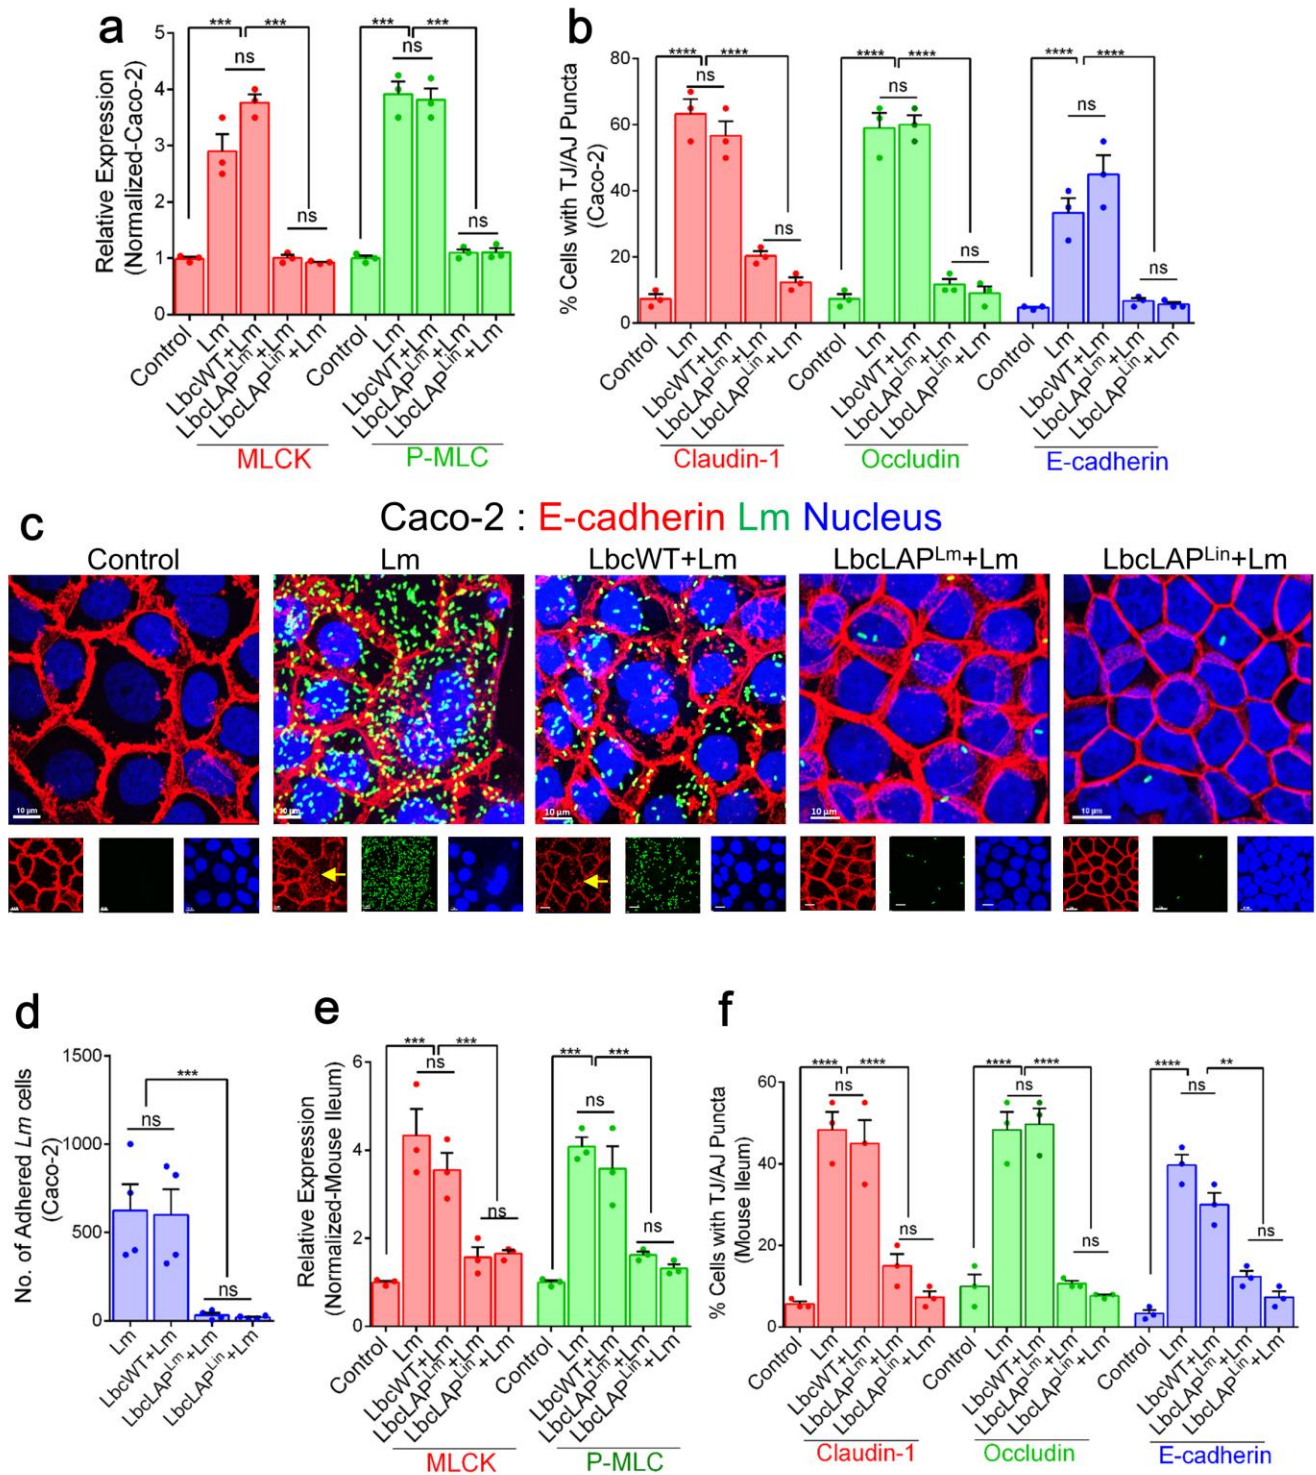

**Supplementary Fig. 6 BLP preserves *Lm*-induced disturbance of intestinal epithelial cell-cell junctional integrity.**

(a, b) Quantitative analysis (mean  $\pm$  SEM,  $n = 3$ ) of MLCK and P-MLC expression (a) and of claudin-1, occludin, and E-cadherin puncta formation (b) from images of immunostained Caco-2 cells (Fig. 7e) treated with LbcWT or BLP strains (MOE; 10, 24 h) before exposure with *Lm* (MOI; 50, 2h).

(c) Separated channel images showing mislocalization (intracellular puncta, endocytosis) of E-cadherin (labeled in red; arrows) in *Lm* exposed cells or treated with LbcWT before *Lm* exposure (MOI; 50, 2h). Caco-2 cells pretreated with BLP strains show intact localization of E-cadherin and markedly reduced adhesion of *Lm*. Separated channels are shown individually at the bottom of the merged images for clarity of the E-cadherin panel in Fig. 7e. Images are representative of five different fields from three independent experiments.

(d) Enumeration (mean  $\pm$  SEM,  $n = 4$  independent biological samples) of adhered *Lm* cells from immunostained images (Fig. 7e) of Caco-2 cells treated with LbcWT or BLP strains (MOE 10, 24 h) before *Lm* exposure (MOI 50, 2h).

(e, f) Quantitative analysis (mean  $\pm$  SEM,  $n = 3$  mice) of MLCK and P-MLC expression (e) and of claudin-1, occludin, and E-cadherin puncta formation (f) from images of immunostained ileal tissues (Fig. 7f) of mock-treated uninfected naïve mice or naïve, LbcWT or BLP-treated mice (10 days) at 48 hpi with *Lm*.

Each point represents an average of five different fields from one of the three (a, b) or four (d) independent experiments or a single mouse per treatment (e, f) The one-way (d) or two-way ANOVA (a, b, e and f) test followed by a Tukey's multiple comparisons was used. For all analysis: \*\*\*\*p < 0.0001; \*\*\*p < 0.001; \*\*p < 0.01; ns, no significance. Source data are provided as a Source Data file.

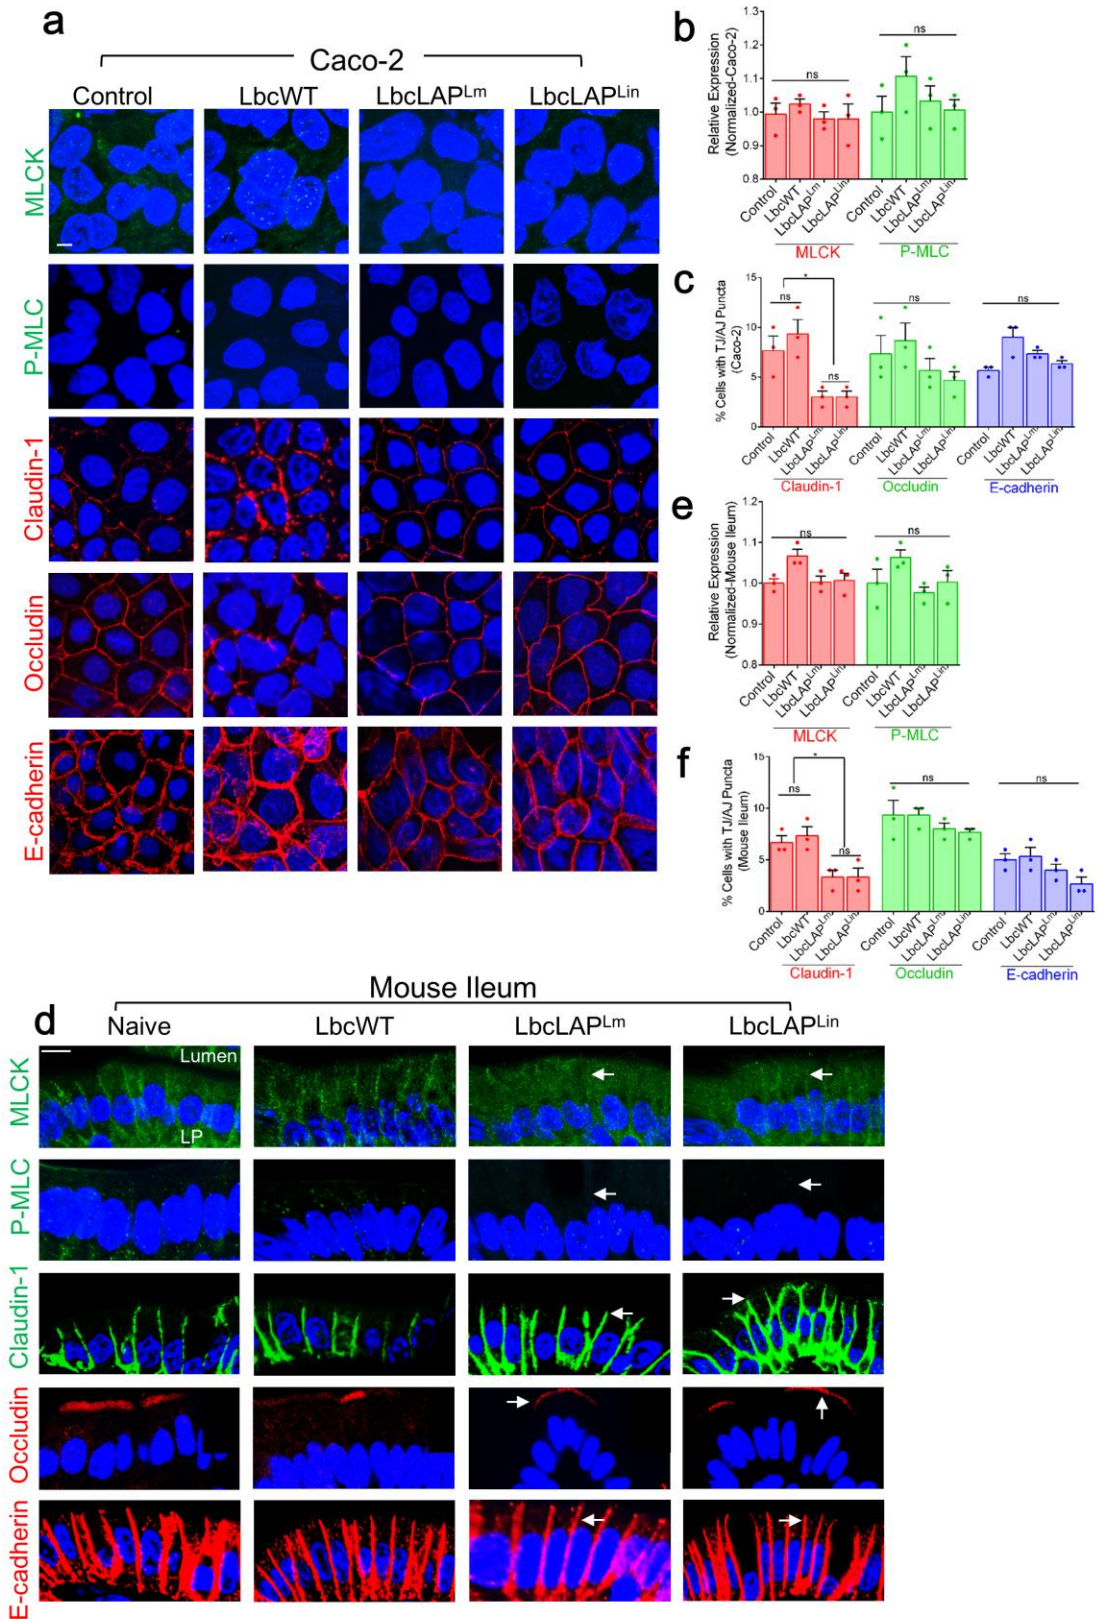

Supplementary Fig. 7 BLP does not cause disturbance of intestinal epithelial cell-cell junctional integrity.

**(a, d)** Confocal immunofluorescence micrographs of immunostained Caco-2 cells without treatment (control) or exposed to LbcWT or BLP strains (MOE 10, 24 h) without *Lm* exposure (**a**) or immunostained ilea from mock-treated mice (naïve) or treated with LbcWT or BLP strains (10 days) without *Lm* exposure (**d**) showing baseline MLCK (green, arrows, **d**) and P-MLC (green, arrows, **d**) expression and intact localization of claudin-1 (red) in Caco-2 (**a**), green in mouse ileum (**d**, arrows), occludin (red, arrows, **d**), and E-cadherin (red, arrows, **d**). Images are representative of five different fields from three independent experiments (**a**) or 3 mice per treatment (**d**). Scale bars, 10  $\mu$ m.

**(b, c, e, f)** Quantitative analysis (mean  $\pm$  SEM,  $n = 3$  biologically independent samples) of MLCK and P-MLC expression in Caco-2 (**b**) and mouse ileum (**e**) and of claudin-1, occludin, and E-cadherin puncta formation in Caco-2 (**c**) and mouse ileum (**f**) from images of immunostained Caco-2 cells (**a**) or mouse ileum (**b**). Each point represents an average of five different fields from one of the three independent experiments (**b, c**) or a single mouse per treatment (**e, f**).

Statistical significance was determined by using the two-way ANOVA (**b, c, e** and **f**) test followed by Tukey's multiple comparisons. \* $p < 0.05$ ; ns, no significance. Source data are provided as a Source Data file.

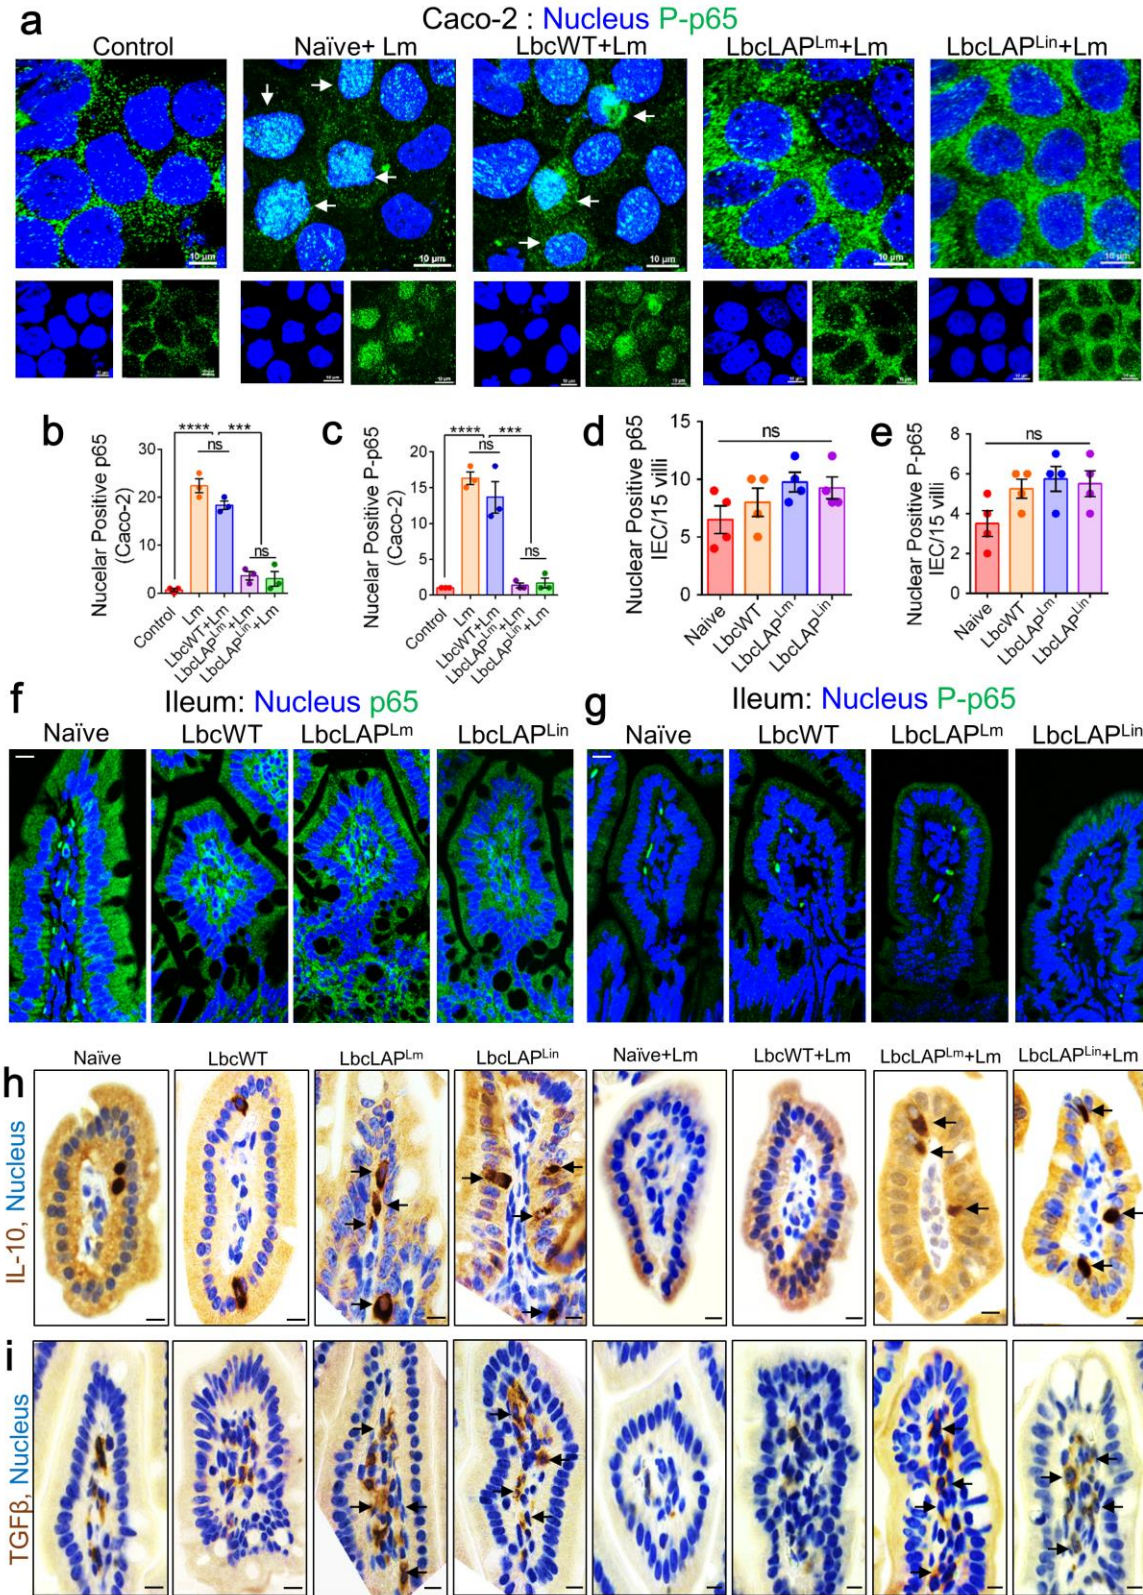

Supplementary Fig. 8 BLP prevents *Lm*-induced NF- $\kappa$ B activation and modulates cytokines.

(a) Confocal immunofluorescence micrographs showing decreased nuclear localization of P-p65 (a, green) in Caco-2 cells treated with BLP strains (MOE 10, 24 h) but not with LbcWT before *Lm* exposure (MOI 50, 1h). Arrows indicate the nuclear localization of P-p65 in *Lm* exposed cells or those treated with LbcWT strain before *Lm* exposure. Separated channels are shown individually in the bottom panels of the merged images. Scale bars, 10  $\mu$ m. Images are representative of five different fields from three independent experiments.

(b, c) Quantified results from **Fig. 8a** expressed as mean  $\pm$  SEM p65 and **Supplementary Fig. 8b** expressed as mean  $\pm$  SEM P-p65 (b) nuclear positive Caco-2 cells. Each point represents five different fields from one of the three independent experiments ( $n = 15$  fields).

(d, e, f, g) Quantified results (mean  $\pm$  SEM) and confocal immunofluorescence micrographs and showing no increase in nuclear localization of p65 (d, f) and P-p65 (e, g) in villi of mice ilea after *L. casei* treatment (LbcWT or BLP) for 10 days, relative to naïve mock-treated mice. Each point in d, e represents an average of 15 villi from a single mouse, 4 mice per group,  $n = 60$  villi. Scale bars, 10  $\mu$ m.

(h, i) Representative immunohistochemical micrographs of sections of the ileum showing increased IL-10<sup>+</sup> cells (a, brown, arrows) and TGF $\beta$ <sup>+</sup> cells (b, brown, arrows) in BLP-treated (10 days) mice, relative to LbcWT-treated (10 days) mice pre or post-*Lm* challenge at 48 hpi. Nuclei are counterstained (blue). Scale bars, 10  $\mu$ m

Statistical significance (b, c, d and e) was determined by using the one-way ANOVA followed by Tukey's multiple comparisons test. For all analysis: \*\*\*\* $p < 0.0001$ ; \*\*\* $p < 0.001$ ; ns, no significance. Source data are provided as a Source Data file.



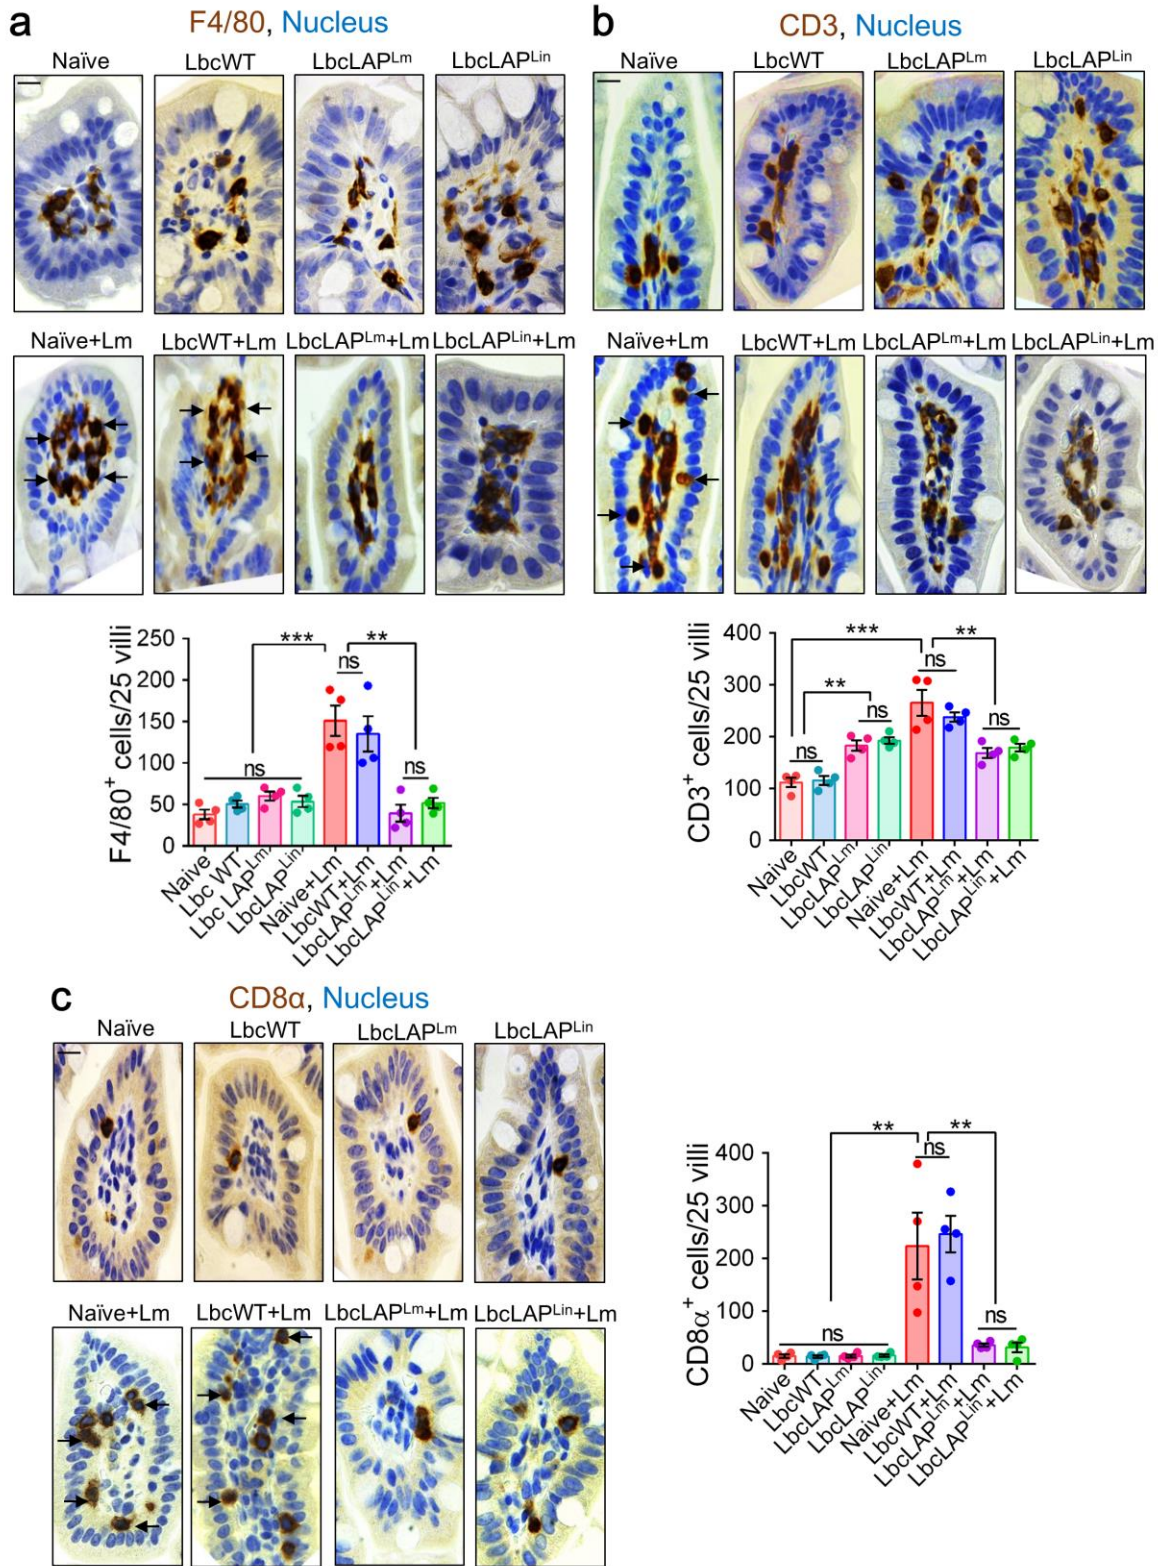

**Supplementary Fig. 9 Analysis of F4/80 (macrophage), CD3 and CD8 positive cells in the intestinal tissues of BLP-treated mice.**

**(a, b)** Representative immunohistochemical micrographs (top panels) and respective quantification (bottom panels, mean  $\pm$  SEM) of ileal tissues showing increased F4/80<sup>+</sup> macrophage (**a**, brown, arrows), CD3<sup>+</sup> cells (**b**, brown, arrows) in naïve or LbcWT-treated (10 days), relative to BLP-treated (10 days) mice at 48 hpi. Bars, 10  $\mu$ m.

**(c)** Representative immunohistochemical micrographs (left) and respective quantification (right, mean  $\pm$  SEM) of ileal tissues showing increased CD8<sup>+</sup> cells (**a**, brown, arrows) in naïve or LbcWT-treated (10 days), relative to BLP-treated (10 days) mice at 48 hpi. Bars, 10  $\mu$ m.

For panels **a-c** tissue sections were counterstained with hematoxylin to stain the nucleus. Each point represents an average of 25 villi from a single mouse, 4 mice per group,  $n = 100$  villi. Statistical significance was determined by using the one-way ANOVA followed by Tukey's multiple comparisons test. For all analysis: \*\*\* $p < 0.001$ ; \*\* $p < 0.01$ ; ns, no significance. Source data are provided as a Source Data file.

**Supplementary Table 1.** List of antibodies, bacterial strains, biological samples, chemicals, critical commercial assays, experimental models (cell lines and mouse strains), oligonucleotides and software/algorithms used in the study.

| Reagents                                          | Source                   | Catalog No.                           |
|---------------------------------------------------|--------------------------|---------------------------------------|
| <b>Antibodies</b>                                 |                          |                                       |
| Mouse monoclonal anti-LAP                         | Our Lab <sup>1</sup>     | N/A                                   |
| Horse anti-mouse IgG (HRP-linked)                 | Cell Signaling           | Cat # 7076, RRID: AB_330924           |
| Goat anti-rabbit IgG (HRP-linked)                 | Cell Signaling           | Cat # 7074, RRID: AB_2099233          |
| Rat monoclonal anti-ZO-1                          | Thermo Fisher Scientific | Cat # MABT11MI, RRID: AB_628459       |
| Rabbit polyclonal anti- <i>Listeria</i>           | Our Lab                  | N/A                                   |
| Rabbit polyclonal anti-InIA                       | Our Lab <sup>2</sup>     | N/A                                   |
| Mouse monoclonal anti-N-acetylmuramidase (NamA)   | Our Lab <sup>3</sup>     | N/A                                   |
| Rabbit polyclonal anti-Hsp60                      | Our Lab <sup>2</sup>     | N/A                                   |
| Mouse monoclonal anti- $\beta$ -actin             | Santa Cruz Biotechnology | Cat # sc-47778, RRID: AB_626632       |
| Normal mouse IgG                                  | Santa Cruz Biotechnology | Cat # sc-2025, RRID: AB_737182        |
| Normal rabbit IgG                                 | Santa Cruz Biotechnology | Santa Cruz Biotechnology              |
| Mouse monoclonal anti-Hsp60                       | Enzo life Science        | Cat # ADI-SPA-806F, RRID: AB_11177888 |
| Rabbit monoclonal anti-MEK 1/2                    | Cell Signaling           | Cat # 8727, RRID:AB_10829473          |
| Rabbit polyclonal anti-Muc-2                      | Novus Biological         | Cat # NBP1-31231, RRID: AB_10003763   |
| Rabbit monoclonal anti- Ki67                      | Cell Marque              | Cat # 275R-15, RRID: AB_1158033       |
| Rabbit polyclonal anti-Cleaved-caspase 3 (Asp175) | Cell Signaling           | Cat # 9661S, RRID: AB_2341188         |
| Mouse monoclonal anti-MLCK                        | Sigma-Aldrich            | Cat # M7905, RRID: AB_477243          |
| Rabbit polyclonal anti-phosphorylated MLC         | Cell Signaling           | Cat # 3671, RRID: AB_330248           |
| Mouse monoclonal anti-phosphorylated MLC          | Cell Signaling           | Cat # 3675, RRID: AB_2250969          |
| Mouse monoclonal anti-Claudin-1                   | Thermo Fisher Scientific | Cat # 37-490-0, RRID: AB_2533323      |
| Mouse monoclonal anti-Occludin                    | Thermo Fisher Scientific | Cat # 33-150-0, RRID: AB_2533101      |
| Rabbit monoclonal anti-E-cadherin (Human)         | Cell Signaling           | Cat # 3195, RRID: AB_2291471          |
| Rat monoclonal anti-E-cadherin (Mouse)            | Invitrogen               | Cat # 13-190-0, RRID: AB_2533005      |

|                                                                                               |                |                                    |
|-----------------------------------------------------------------------------------------------|----------------|------------------------------------|
| Rabbit monoclonal anti-NF- $\kappa$ B p65                                                     | Cell Signaling | Cat # 8242, RRID: AB_10859369      |
| Rabbit monoclonal anti-Phospho-NF- $\kappa$ B p65 (Ser536)                                    | Cell Signaling | Cat # 3033, RRID: AB_331284        |
| Rat monoclonal anti-IL-10                                                                     | Abcam          | Cat # AB 189392, RRID: AB_733113   |
| Rat monoclonal anti-TGF- $\beta$ clone (EPR21143)                                             | Abcam          | Cat # AB215715, RRID: NA           |
| Rat monoclonal anti-F4/80                                                                     | Bio-Rad        | Cat # MCA497R, RRID: AB_323279     |
| Rat monoclonal anti-CD4                                                                       | Invitrogen     | Cat # 14-9766-82, RRID: AB_2573008 |
| Rabbit polyclonal anti-CD3                                                                    | Dako           | Cat # A0452, RRID: AB_2335677      |
| Rat monoclonal anti-CD8 $\alpha$                                                              | Invitrogen     | Cat # 14-0808-82, RRID: AB_2572861 |
| Rat monoclonal anti-FoxP3                                                                     | Invitrogen     | Cat # 14-5773-82, RRID: AB_467576  |
| Rabbit polyclonal anti-CD11c                                                                  | Invitrogen     | Cat # PA5-79537, RRID: AB_2746652  |
| Goat polyclonal anti-NKp46                                                                    | R&D Systems    | Cat # AF2225, RRID: AB_355192      |
| Goat anti-mouse IgG (H+L), F(ab') <sub>2</sub> Fragment (Alexa Fluor 488 Conjugate) antibody  | Cell Signaling | Cat # 4408, RRID: AB_10694704      |
| Goat anti-rabbit IgG (H+L), F(ab') <sub>2</sub> Fragment (Alexa Fluor 488 Conjugate) antibody | Cell Signaling | Cat # 4412, RRID: AB_1904025       |
| Goat anti-mouse IgG (H+L), F(ab') <sub>2</sub> Fragment (Alexa Fluor 555 Conjugate) antibody  | Cell Signaling | Cat # 4409, RRID: AB_1904022       |
| Goat anti-rabbit IgG (H+L), F(ab') <sub>2</sub> Fragment (Alexa Fluor 555 Conjugate) antibody | Cell Signaling | Cat # 4413, RRID: AB_10694110      |
| Goat anti-rat IgG (H+L), (Alexa Fluor 555 Conjugate) antibody                                 | Cell Signaling | Cat # 4417, RRID: AB_10696896      |
| Goat anti-rabbit IgG (H+L), Highly Cross-Adsorbed (Alexa Fluor 647 Conjugate) antibody        | Invitrogen     | Cat # A21245, RRID: AB_253813      |
| Goat anti-rabbit ImmPRESS HRP                                                                 | Vector Labs    | Cat # MP-7451, RRID: AB_2631198    |
| Goat anti-rat ImmPRESS HRP (M adsorbed)                                                       | Vector Labs    | Cat # MP-7444, RRID: AB_2336530    |
| Horse anti-mouse ImmPRESS HRP                                                                 | Vector Labs    | Cat # MPX-2402, RRID: AB_2336831   |
| Horse anti-Goat ImmPRESS HRP                                                                  | Vector Labs    | Cat # MP-7405, RRID: AB_2336526    |
| Isotype control Mouse IgG                                                                     | Vector Labs    | Cat # I-2000, RRID: AB_2336354     |
| Isotype control Rabbit IgG                                                                    | Vector Labs    | Cat # I-1000, RRID: AB_2336355     |

|                                                                                                   |                               |                                |
|---------------------------------------------------------------------------------------------------|-------------------------------|--------------------------------|
| Isotype control Rat IgG                                                                           | Vector Labs                   | Cat # I-4000, RRID: AB_2336356 |
| <b>Bacterial Strains</b>                                                                          |                               |                                |
| <i>L. monocytogenes</i> F4244 (WT), serovar 4b, a clinical isolate                                | CDC, Atlanta, GA <sup>3</sup> | N/A                            |
| <i>L. monocytogenes</i> KB208 ( <i>lap</i> <sup>-</sup> )                                         | Our Lab <sup>4</sup>          | N/A                            |
| <i>L. monocytogenes</i> CKB208 ( <i>lap</i> <sup>-</sup> + <i>lap</i> <sup>L<sup>m</sup></sup> )  | Our Lab <sup>4</sup>          | N/A                            |
| <i>L. monocytogenes</i> CKB208 ( <i>lap</i> <sup>-</sup> + <i>lap</i> <sup>L<sup>in</sup></sup> ) | This study                    | N/A                            |
| <i>L. monocytogenes</i> F4244 expressing GFP                                                      | Bruce Applegate Lab           | N/A                            |
| <i>L. innocua</i> F4248                                                                           | CDC, Atlanta, GA              | N/A                            |
| <i>Lactobacillus casei</i> , ATCC334 (WT)                                                         | Michael Miller, UIUC          | N/A                            |
| <i>Lactobacillus casei</i> , vancomycin-resistant (300 µg/ml)                                     | This study                    | N/A                            |
| <i>L. casei</i> expressing LAP of <i>Lm</i> (AKB906, LbcLAP <sup>L<sup>m</sup></sup> )            | This study                    | N/A                            |
| <i>L. casei</i> expressing LAP of <i>L. innocua</i> (AKB907, LbcLAP <sup>L<sup>in</sup></sup> )   | This study                    | N/A                            |
| <i>L. casei</i> carrying empty plasmid pLP401T (Lbc <sup>V<sup>ec</sup></sup> )                   | This study                    | N/A                            |
| <i>Pediococcus acidilactici</i> strain H                                                          | Our Lab <sup>5</sup>          | N/A                            |
| <i>Salmonella enterica</i> serovar Typhimurium ver. Copenhagen                                    | Our Lab                       | N/A                            |
| <b>Biological Samples</b>                                                                         |                               |                                |
| Tissues isolated from ileum and colon of 8-10 weeks-old A/J mice                                  | N/A                           | N/A                            |
| <b>Chemicals</b>                                                                                  |                               |                                |
| MRS Broth                                                                                         | Difco/BD                      | Cat # D088107                  |
| Modified MRS containing 1% mannitol                                                               | Koo et al. 2012 <sup>6</sup>  | N/A                            |
| Modified Oxford agar Base                                                                         | Neogen Corporation            | Cat # 7428                     |
| Modified Oxford agar Base supplement                                                              | Neogen Corporation            | Cat # 7991                     |
| Buffered <i>Listeria</i> enrichment broth                                                         | Neogen Corporation            | Cat # 7675                     |
| Buffered <i>Listeria</i> enrichment broth supplement                                              | Neogen Corporation            | Cat # 7980                     |
| Tryptic Soy Broth                                                                                 | Difco/BD                      | Cat # DF0370-07-5              |
| Brain heart infusion agar                                                                         | Neogen Corporation            | Cat # 7116                     |
| Pepsin                                                                                            | Sigma-Aldrich                 | Cat # 1.07185                  |
| Lipase                                                                                            | Sigma-Aldrich                 | Cat # L0382                    |
| Bovine Bile                                                                                       | Sigma-Aldrich                 | Cat # B8381                    |
| Porcine pancreatin                                                                                | Sigma-Aldrich                 | Cat # P3292                    |
| DAPI                                                                                              | Cell Signaling                | Cat # 4083                     |
| FITC-labeled 4 kDa dextran                                                                        | Sigma-Aldrich                 | Cat # 46944                    |
| Anti-Listerial magnetic Dynabeads                                                                 | Thermo Fischer Scientific     | Cat # 71006                    |

|                                                                                                                       |                                          |                                                                                                                                                               |
|-----------------------------------------------------------------------------------------------------------------------|------------------------------------------|---------------------------------------------------------------------------------------------------------------------------------------------------------------|
| Halt proteases and phosphatase inhibitors                                                                             | Thermo Fischer Scientific                | Cat # PI78443                                                                                                                                                 |
| Restore Western Blot Stripping Buffer                                                                                 | Thermo Fischer Scientific                | Cat # PI46430                                                                                                                                                 |
| Proteinase K                                                                                                          | Dako                                     | Cat # S3004                                                                                                                                                   |
| Bloxall solution (Blocking Solution)                                                                                  | Vector Labs                              | Cat # SP-6000                                                                                                                                                 |
| ImmPACT DAB (Chromogen)                                                                                               | Vector Labs                              | Cat # SK-4105                                                                                                                                                 |
| ImmPACT Vector Red (Chromogen)                                                                                        | Vector Labs                              | Cat # SK-5105                                                                                                                                                 |
| Prolong Gold (Antifade Reagent)                                                                                       | Invitrogen                               | Cat # P36934                                                                                                                                                  |
| <b>Critical Commercial Assays</b>                                                                                     |                                          |                                                                                                                                                               |
| Mouse TNF- $\alpha$ ELISA kit                                                                                         | Ray Biotech                              | Cat # ELM-TNF $\alpha$ -1                                                                                                                                     |
| Mouse IL-6 ELISA kit                                                                                                  | Ray Biotech                              | Cat # ELM-IL6-1                                                                                                                                               |
| Mouse IFN $\gamma$ ELISA kit                                                                                          | Ray Biotech                              | Cat # ELM-IFN $\gamma$ -1                                                                                                                                     |
| BCA assay kit                                                                                                         | Thermo Fisher Scientific                 | Cat # PI23235                                                                                                                                                 |
| B-PER extraction kit                                                                                                  | Thermo Fisher Scientific                 | Cat # 78243                                                                                                                                                   |
| Mem-Per Plus Membrane Protein Extraction Kit                                                                          | Thermo Fisher Scientific                 | Cat # PI89842                                                                                                                                                 |
| <b>Experimental Models: Cell Lines</b>                                                                                |                                          |                                                                                                                                                               |
| Cell line: Caco-2                                                                                                     | ATCC                                     | Cat # HTB37                                                                                                                                                   |
| Cell line: Caco-2 presenting stable suppression of <i>hsp60</i> mRNA via short hairpin RNA (shRNA) mediated targeting | Our Lab <sup>2</sup>                     | N/A                                                                                                                                                           |
| Cell line: Caco-2 presenting a non-targeting control shRNA vector                                                     | Our Lab <sup>2</sup>                     | N/A                                                                                                                                                           |
| Cell line: Caco-2 presenting a constitutive overexpression of Hsp60                                                   | Our Lab <sup>2</sup>                     | N/A                                                                                                                                                           |
| Cell line: MDCK                                                                                                       | ATCC                                     | Cat # MDCK (NBL-2) CCL-34                                                                                                                                     |
| <b>Experimental Models: Organisms/Strains</b>                                                                         |                                          |                                                                                                                                                               |
| Mouse: A/J                                                                                                            | The Jackson Laboratory                   | Stock # 000646                                                                                                                                                |
| <b>Oligonucleotides</b>                                                                                               |                                          |                                                                                                                                                               |
| Lcas467 DNA Oligo, Alexa 488<br>5'<br>/5Alex488N/CCGTCACGCCGACAACAG-<br>3'                                            | Integrated DNA Technologies <sup>7</sup> | N/A                                                                                                                                                           |
| LAPN-F 5'-<br>GACCATGGATGGCAATTAAGAAAATG-<br>3' and LAPX-R-5'-<br>GACTCGAGTCAAACACCTTTGTAAG-3'                        | Integrated DNA Technologies <sup>6</sup> |                                                                                                                                                               |
| <b>Software and Algorithms</b>                                                                                        |                                          |                                                                                                                                                               |
| Bio-Rad quantity one 4.6.9                                                                                            | Bio-Rad                                  | <a href="http://www.bio-rad.com/en-ch/product/quantity-one-1-d-analysis-software">http://www.bio-rad.com/en-ch/product/quantity-one-1-d-analysis-software</a> |
| ImageJ 1.51t                                                                                                          | NIH                                      | <a href="https://imagej.nih.gov/ij/">https://imagej.nih.gov/ij/</a>                                                                                           |
| GraphPad Prism 6.0                                                                                                    | GraphPad Software                        | <a href="https://www.graphpad.com/scientific-software/prism/">https://www.graphpad.com/scientific-software/prism/</a>                                         |

|                           |           |                                                                                                                                                                             |
|---------------------------|-----------|-----------------------------------------------------------------------------------------------------------------------------------------------------------------------------|
| Microsoft Excel 2010/365  | Microsoft | <a href="https://products.office.com/en-us/excel">https://products.office.com/en-us/excel</a>                                                                               |
| Nikon Elements Ver4.60.00 | Nikon     | <a href="https://www.nikoninstruments.com/Products/Software/NIS-Elements-Basic-Research">https://www.nikoninstruments.com/Products/Software/NIS-Elements-Basic-Research</a> |

## Supplementary References

1. Pandiripally, V.K., Westbrook, D.G., Sunki, G.R. & Bhunia, A.K. Surface protein p104 is involved in adhesion of *Listeria monocytogenes* to human intestinal cell line, Caco-2. *J. Med. Microbiol.* **48**, 117-124 (1999).
2. Burkholder, K.M. & Bhunia, A.K. *Listeria monocytogenes* uses *Listeria* adhesion protein (LAP) to promote bacterial transepithelial translocation, and induces expression of LAP receptor Hsp60. *Infect. Immun.* **78**, 5062-5073 (2010).
3. Bailey, T.W., do Nascimento, N.C. & Bhunia, A.K. Genome sequence of *Listeria monocytogenes* strain F4244, a 4b serotype. *Genome Announcements* **5**, e01324-01317 (2017).
4. Jagadeesan, B. et al. LAP, an alcohol acetaldehyde dehydrogenase enzyme in *Listeria* promotes bacterial adhesion to enterocyte-like Caco-2 cells only in pathogenic species. *Microbiology* **156**, 2782-2795 (2010).
5. Bhunia, A.K., Johnson, M.C. & Ray, B. Purification, characterization and antimicrobial spectrum of a bacteriocin produced by *Pediococcus acidilactici*. *J. Appl. Bacteriol.* **65**, 261-268 (1988).
6. Koo, O.K., Amalaradjou, M.A.R. & Bhunia, A.K. Recombinant probiotic expressing *Listeria* adhesion protein attenuates *Listeria monocytogenes* virulence in vitro. *PLoS One* **7**, e29277 (2012).
7. Quevedo, B. et al. Phylogenetic group- and species-specific oligonucleotide probes for single-cell detection of lactic acid bacteria in oral biofilms. *BMC Microbiol.* **11**, 14 (2011).
